# Supplementary material
Source: PubMed Central journal article supplement (PMC5823772)
Supplement: NIHMS934085-supplement-Supplement.pdf [file NIHMS934085-supplement-Supplement.pdf]

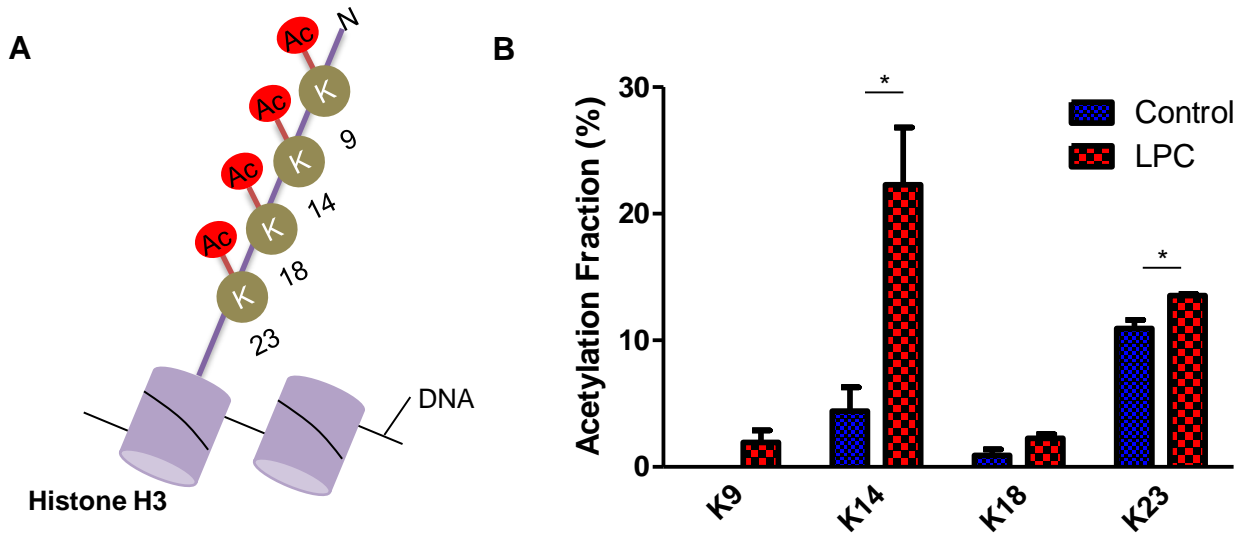

**Supplemental Figure I. Lysophosphatidylcholine (LPC) significantly induces site-specific H3K14ac in human aortic endothelial cells.** **A.** Schematic representation of the four histone acetylation sites on histone H3. **B.** After treatment of human aortic endothelial cells (HAECs) with LPC (10 $\mu$ M) for 2 hours, histones were purified. After propionylation and trypsin digestion, the acetylation fractions on individual lysine residues on histone H3 were measured by HPLC-MS method. Statistical analysis of the acetylation fractions on lysine residues of H3 between control and LPC treatment group were shown.

# Supplemental Table I. Genes significantly induced by LPC in HAECs.

| Gene<br>Symbol | Fold<br>regulation | <i>p</i> -value | Gene<br>Symbol | Fold<br>regulation | <i>p</i> -value |
|----------------|--------------------|-----------------|----------------|--------------------|-----------------|
| KIZ            | 3.47               | 0.036           | NSDHL          | 1.67               | 0.003           |
| IGFBP5         | 3.23               | 0.000           | SULT1A1        | 1.63               | 0.018           |
| LYPD5          | 2.99               | 0.031           | IGF2           | 1.61               | 0.024           |
| SELE           | 2.87               | 0.002           | PLA2G4C        | 1.61               | 0.005           |
| S100A4         | 2.73               | 0.000           | EBP            | 1.59               | 0.009           |
| IL32           | 2.70               | 0.000           | RELB           | 1.59               | 0.021           |
| DENND2A        | 2.61               | 0.042           | CXCL1          | 1.59               | 0.014           |
| CAPN3          | 2.58               | 0.048           | MMAB           | 1.59               | 0.015           |
| ZNF778         | 2.45               | 0.004           | AOX1           | 1.58               | 0.018           |
| LAT            | 2.44               | 0.027           | HMGCS1         | 1.58               | 0.007           |
| TRAF1          | 2.30               | 0.012           | ZNF185         | 1.57               | 0.005           |
| GCH1           | 2.18               | 0.004           | GSDMC          | 1.56               | 0.028           |
| BIRC3          | 2.17               | 0.022           | IL1RL1         | 1.55               | 0.006           |
| CDRT4          | 2.15               | 0.043           | GBP1           | 1.55               | 0.015           |
| CCDC24         | 2.14               | 0.026           | RPL21          | 1.53               | 0.011           |
| DCAF12L1       | 2.13               | 0.034           | QPCTL          | 1.53               | 0.026           |
| PRPF38B        | 2.06               | 0.000           | LIPG           | 1.52               | 0.015           |
| C8orf4         | 1.99               | 0.010           | TMEM154        | 1.52               | 0.015           |
| MVK            | 1.94               | 0.000           | AKR1C3         | 1.51               | 0.011           |
| LDLR           | 1.87               | 0.000           | ROGDI          | 1.49               | 0.048           |
| FADS2          | 1.85               | 0.000           | MSMO1          | 1.49               | 0.012           |
| IL1B           | 1.85               | 0.037           | TRIM16         | 1.49               | 0.015           |
| MVD            | 1.83               | 0.000           | LSS            | 1.48               | 0.015           |
| DHCR7          | 1.82               | 0.000           | SLC2A6         | 1.47               | 0.022           |
| ST6GALNAC1     | 1.81               | 0.023           | TM7SF2         | 1.46               | 0.042           |
| HIST1H4K       | 1.81               | 0.006           | INSIG1         | 1.46               | 0.018           |
| SCD            | 1.79               | 0.000           | GALNT6         | 1.45               | 0.022           |
| TNFSF15        | 1.79               | 0.006           | <b>ICAM1</b>   | <b>1.45</b>        | <b>0.026</b>    |
| SFMBT1         | 1.78               | 0.028           | CALD1          | 1.44               | 0.023           |
| CCL2           | 1.78               | 0.000           | CCDC69         | 1.44               | 0.028           |
| CREB5          | 1.77               | 0.023           | CXCL8          | 1.43               | 0.034           |
| TGFB3          | 1.75               | 0.034           | ADAMTS1        | 1.43               | 0.046           |
| RSPH3          | 1.73               | 0.033           | SQLE           | 1.42               | 0.027           |
| TMEM158        | 1.71               | 0.006           | CYP51A1        | 1.42               | 0.027           |
| HMGXB4         | 1.70               | 0.045           | FDFT1          | 1.38               | 0.044           |
| TAF7L          | 1.68               | 0.042           | RDH11          | 1.38               | 0.044           |

# Supplemental Table II. Genes significantly suppressed by IL-35 in HAECs.

| Gene Symbol     | Fold regulation | p-value | Gene Symbol  | Fold regulation | p-value      |
|-----------------|-----------------|---------|--------------|-----------------|--------------|
| BOLA2/BOLA2B    | minus inf       | 0.000   | TDRD10       | -1.58           | 0.044        |
| TMEM189-UBE2V1  | -4851.45        | 0.012   | COMMD6       | -1.569          | 0.003        |
| ZNF273          | -4.533          | 0.047   | QSER1        | -1.561          | 0.002        |
| FAM45A          | -3.067          | 0.003   | BOLA1        | -1.502          | 0.049        |
| NEK3            | -3.044          | 0.001   | CD58         | -1.493          | 0.034        |
| IL33            | -3.016          | 0.012   | ZNF182       | -1.493          | 0.033        |
| GOLGA8A/GOLGA8B | -2.827          | 0.013   | RRAGC        | -1.491          | 0.016        |
| NLGN4Y          | -2.706          | 0.041   | USP14        | -1.49           | 0.010        |
| FSIP1           | -2.413          | 0.048   | NIPBL        | -1.49           | 0.006        |
| ZBED3           | -2.386          | 0.031   | PTPN12       | -1.484          | 0.006        |
| CAPN3           | -2.335          | 0.042   | NUS1         | -1.454          | 0.039        |
| RMI1            | -2.279          | 0.002   | PSME4        | -1.452          | 0.007        |
| KARS            | -2.163          | 0.003   | MBTPS2       | -1.448          | 0.040        |
| CYP26B1         | -2.056          | 0.001   | CXCL1        | -1.446          | 0.025        |
| C15orf52        | -1.991          | 0.000   | ZMYM1        | -1.446          | 0.044        |
| ZNF620          | -1.942          | 0.017   | CNOT6        | -1.441          | 0.017        |
| GLTSCR1         | -1.924          | 0.045   | RELB         | -1.44           | 0.033        |
| CDRT4           | -1.886          | 0.042   | SEC63        | -1.423          | 0.029        |
| POLR2A          | -1.882          | 0.000   | C18orf54     | -1.419          | 0.047        |
| IGFBP5          | -1.878          | 0.000   | UBE2B        | -1.412          | 0.035        |
| MCEE            | -1.866          | 0.008   | SLC46A3      | -1.404          | 0.025        |
| SMG7            | -1.83           | 0.000   | ZFC3H1       | -1.391          | 0.043        |
| PLCB4           | -1.777          | 0.024   | CCNG2        | -1.389          | 0.035        |
| CST4            | -1.776          | 0.018   | VPS13B       | -1.379          | 0.044        |
| SAMD10          | -1.739          | 0.021   | SREK1IP1     | -1.379          | 0.031        |
| BICD1           | -1.727          | 0.023   | HNRNPA3      | -1.377          | 0.034        |
| CXCL8           | -1.712          | 0.000   | LYST         | -1.376          | 0.049        |
| IL1B            | -1.703          | 0.036   | HNRNPD       | -1.369          | 0.043        |
| TGFB3           | -1.64           | 0.029   | <b>ICAM1</b> | <b>-1.363</b>   | <b>0.031</b> |
| PRDM5           | -1.627          | 0.038   | SON          | -1.362          | 0.023        |
| RAD51B          | -1.618          | 0.029   | RAPGEF5      | -1.361          | 0.036        |
| TRAF1           | -1.61           | 0.050   | PTP4A1       | -1.359          | 0.034        |
| STC1            | -1.608          | 0.030   | ABI3BP       | -1.349          | 0.047        |
| HERC6           | -1.604          | 0.018   | PABPC3       | -1.344          | 0.048        |

# Supplemental Table III. Ingenuity pathway analysis of LPC-induced and IL-35-suppressed genes in HAECs.

| Diseases or Functions Annotation         | p-Value  | Molecules                                            | # Molecules |
|------------------------------------------|----------|------------------------------------------------------|-------------|
| arrest in movement of cells              | 1.02E-10 | CXCL1,CXCL8,ICAM1,IL1B                               | 4           |
| cell death of epithelial cells           | 8.92E-10 | CXCL8,ICAM1,IGFBP5,IL1B,RELB,TGFB3,TRAF1             | 7           |
| cell rolling of granulocytes             | 2.10E-09 | CXCL1,CXCL8,ICAM1,IL1B                               | 4           |
| TH1 immune response                      | 1.38E-08 | CXCL8,ICAM1,IL1B,RELB                                | 4           |
| immune response of phagocytes            | 1.69E-08 | CXCL1,CXCL8,ICAM1,IL1B,RELB                          | 5           |
| response of myeloid cells                | 2.02E-08 | CXCL1,CXCL8,ICAM1,IL1B,RELB                          | 5           |
| immune response of neutrophils           | 2.80E-08 | CXCL1,CXCL8,ICAM1,RELB                               | 4           |
| adhesion of neutrophils                  | 3.10E-08 | CXCL1,CXCL8,ICAM1,IL1B                               | 4           |
| growth of tumor                          | 3.18E-08 | CXCL1,CXCL8,ICAM1,IGFBP5,IL1B,RELB,TGFB3             | 7           |
| arrest in cell rolling of leukocytes     | 3.26E-08 | CXCL8,ICAM1,IL1B                                     | 3           |
| migration of dermal cells                | 3.93E-08 | CXCL1,CXCL8,ICAM1,TGFB3                              | 4           |
| differentiation of cells                 | 4.59E-08 | CAPN3,CXCL1,CXCL8,ICAM1,IGFBP5,IL1B,RELB,TGFB3,TRAF1 | 9           |
| TH1 immune response of T lymphocytes     | 4.76E-08 | CXCL8,ICAM1,IL1B                                     | 3           |
| binding of cells                         | 5.21E-08 | CXCL1,CXCL8,ICAM1,IGFBP5,IL1B,RELB                   | 6           |
| extravasation of neutrophils             | 5.65E-08 | CXCL1,ICAM1,IL1B                                     | 3           |
| allergic inflammation                    | 8.97E-08 | CXCL1,CXCL8,IL1B                                     | 3           |
| migration of neutrophils                 | 1.04E-07 | CXCL1,CXCL8,ICAM1,IL1B                               | 4           |
| binding of professional phagocytic cells | 1.37E-07 | CXCL1,CXCL8,ICAM1,RELB                               | 4           |
| apoptosis of epithelial cells            | 1.47E-07 | CXCL8,IGFBP5,IL1B,RELB,TGFB3                         | 5           |
| activation of epithelial cells           | 1.51E-07 | CXCL8,ICAM1,IL1B                                     | 3           |
