# Supplementary material
Source: PubMed Central journal article supplement (PMC5823772)

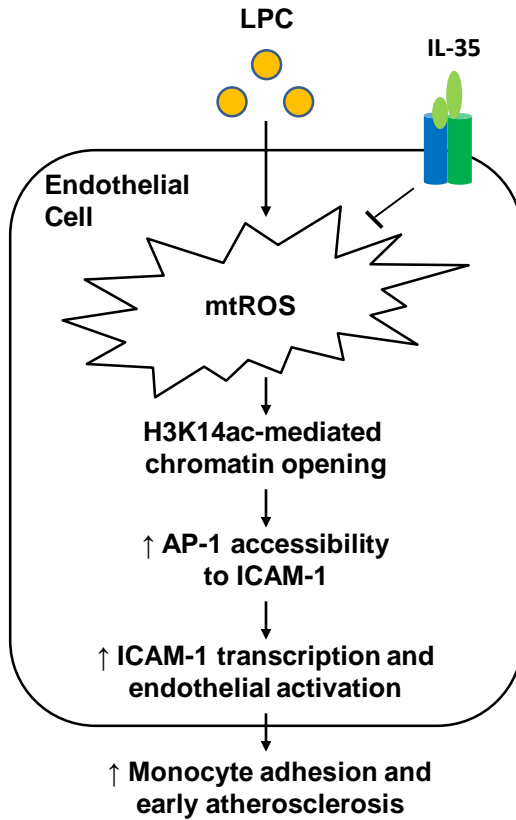

Supplement: NIHMS934085-supplement-Graphic_Abstract.pdf [file NIHMS934085-supplement-Graphic_Abstract.pdf]
